# Supplementary material for: Retinoic acid orchestrates NRF2 and FTH to alleviate iron-aggravated gut redox imbalance in E. coli-challenged piglets
Source: Research Square preprint supplement (doi:10.21203/rs.3.rs-7803183/v1), 2025-10-29
Supplement: Supplementary file 1 [file 65302657af40be00a239394e.docx]

**Fig. 3A**


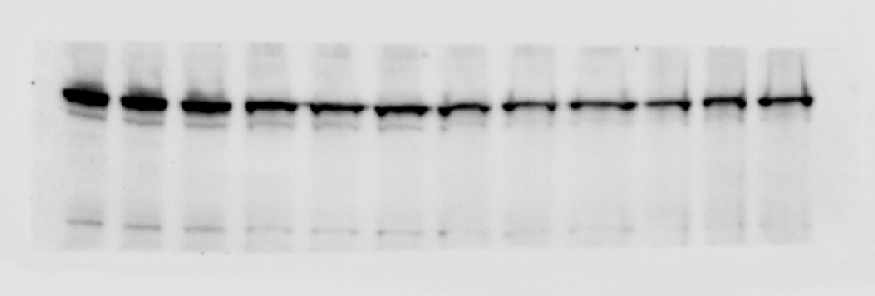
 **pNRF2**


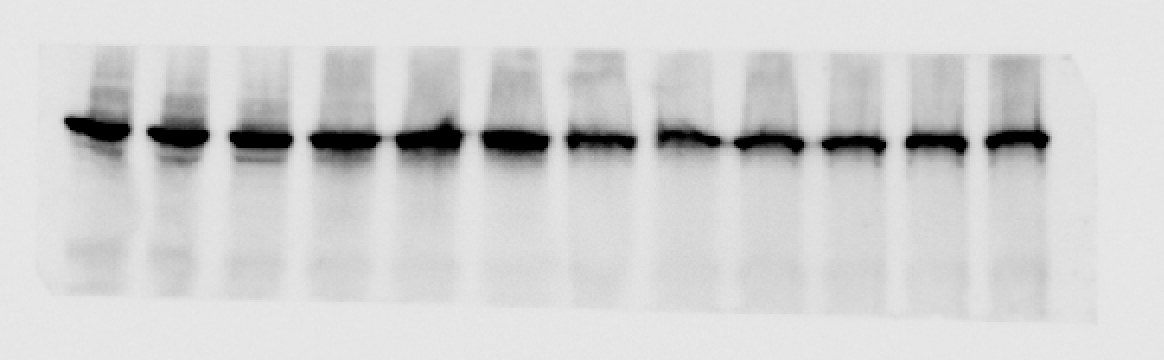
 **NRF2**


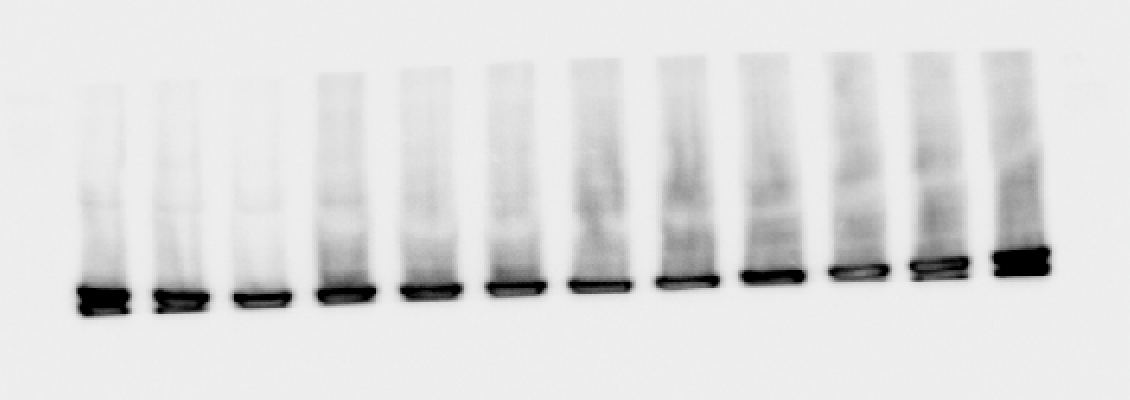
 **SLC3A2**


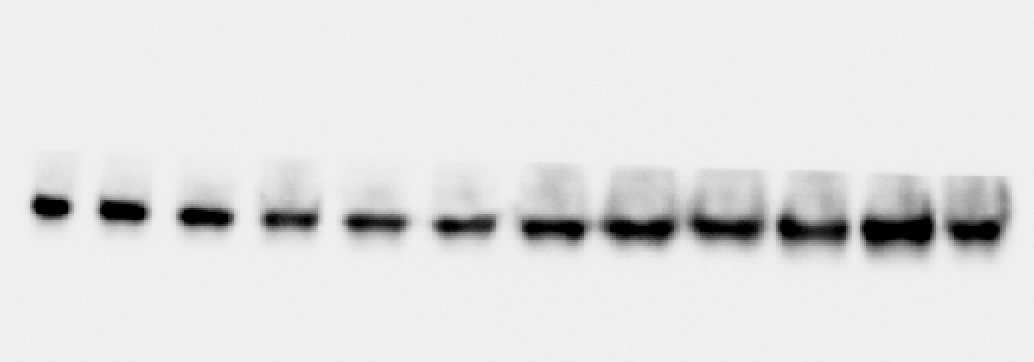
 **Keap1**

**
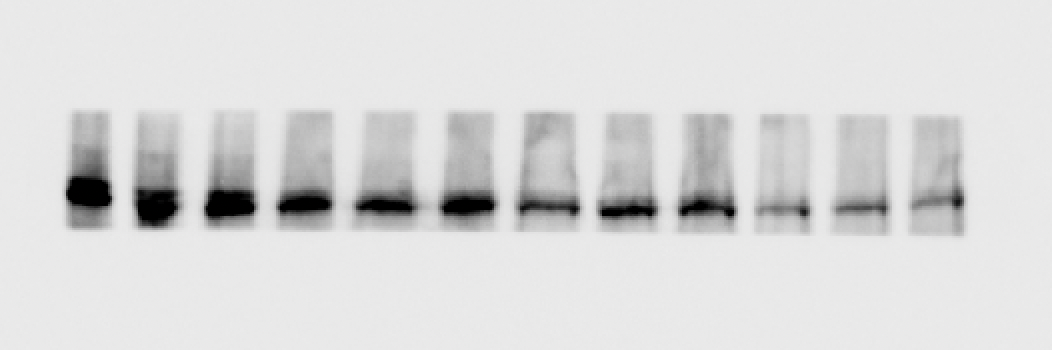
 SQSTM1**


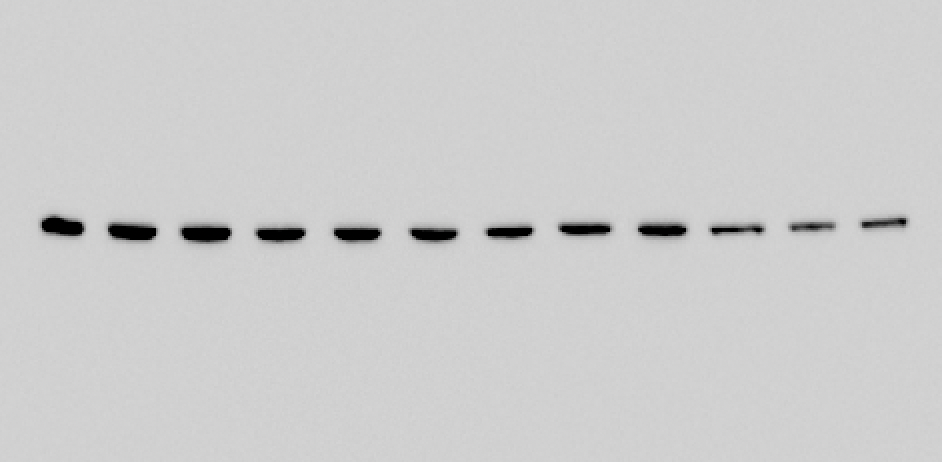
 **SLC7A11**

**
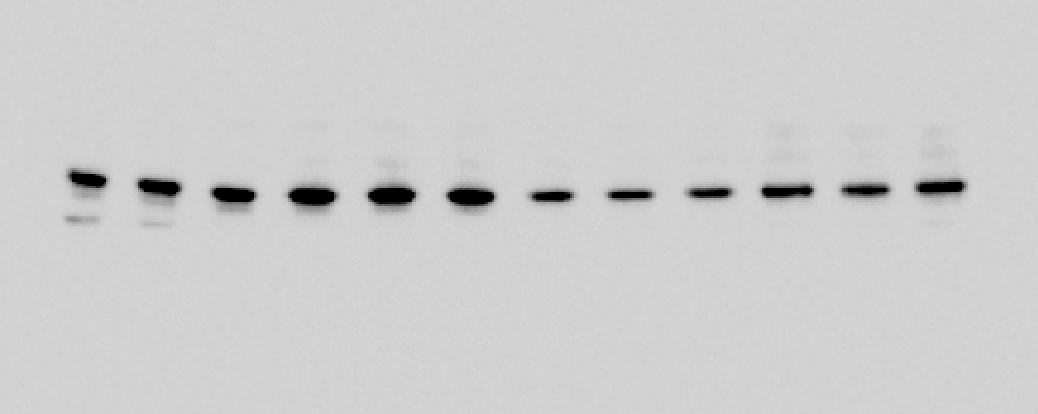
 HO-1**

**
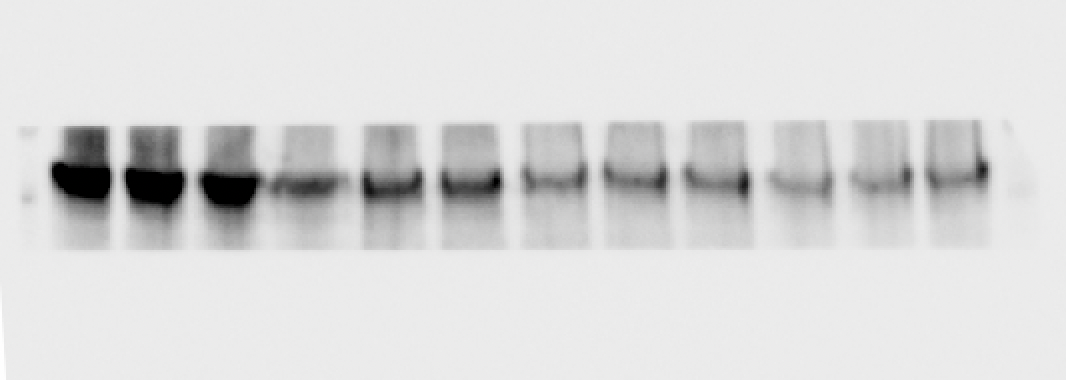
 NQO1**


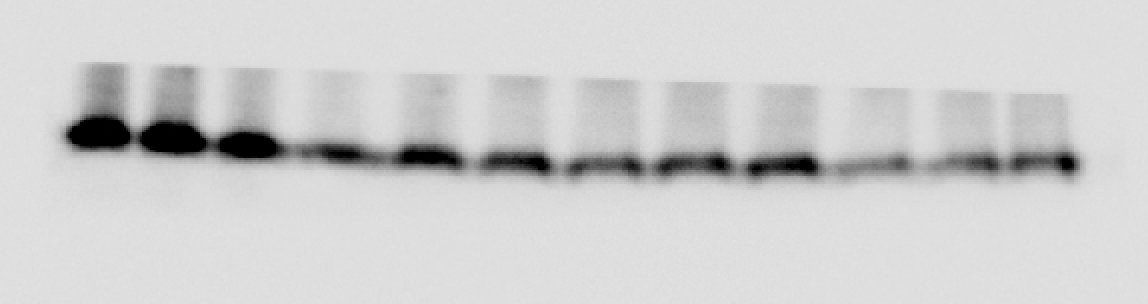
**GPX4**
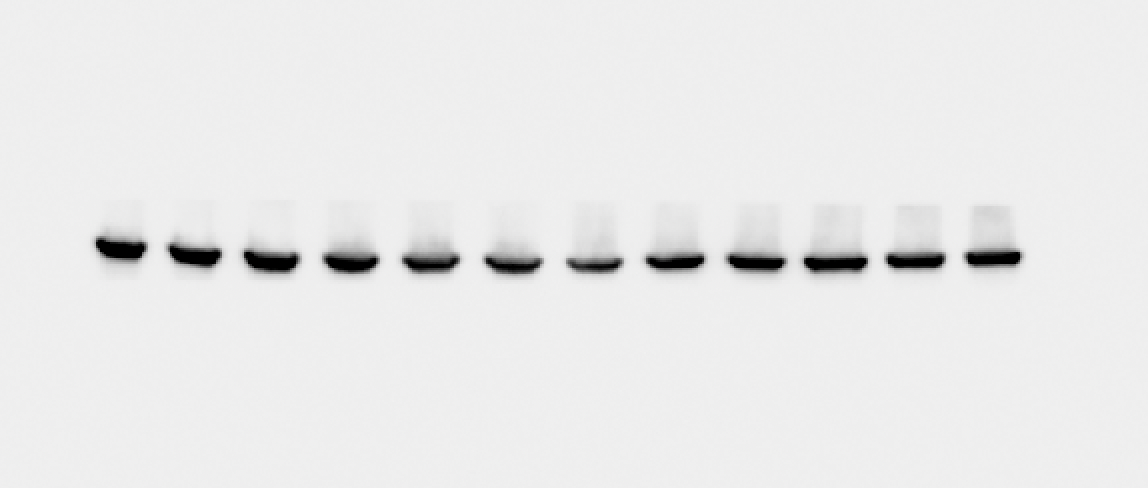
**Actin**

**Fig. 3B**


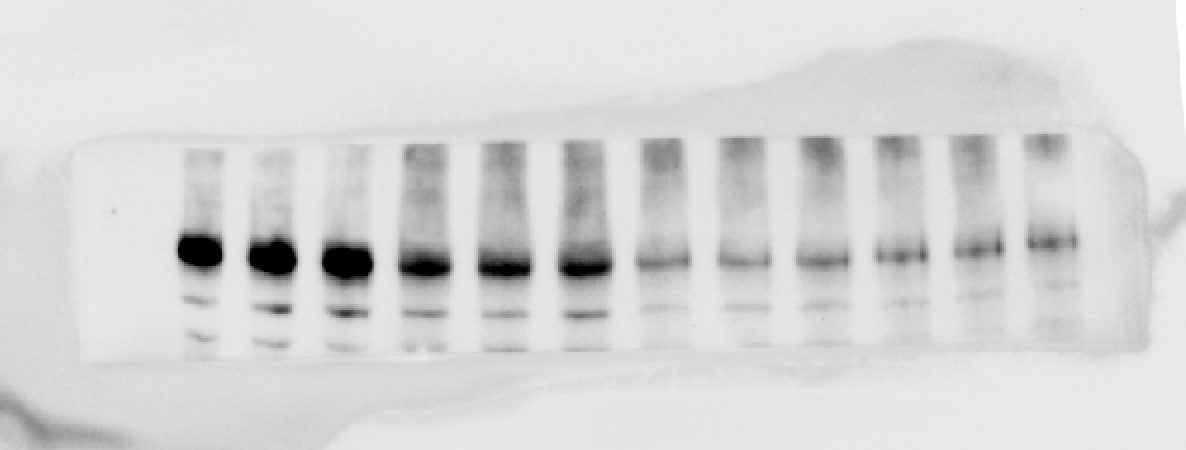
**TFR1**

**
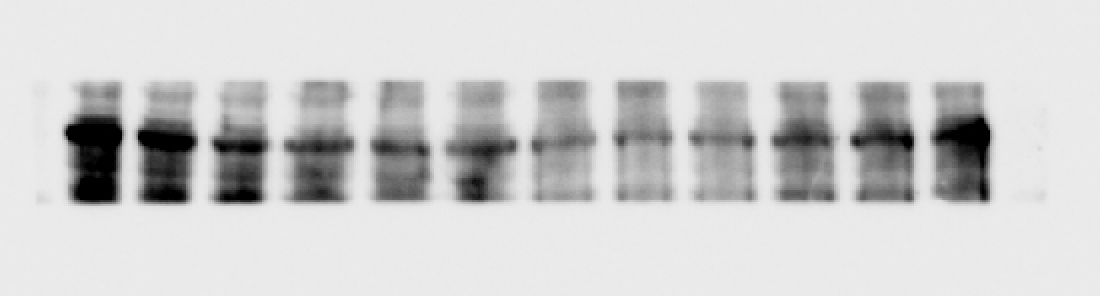
Fpn**

**
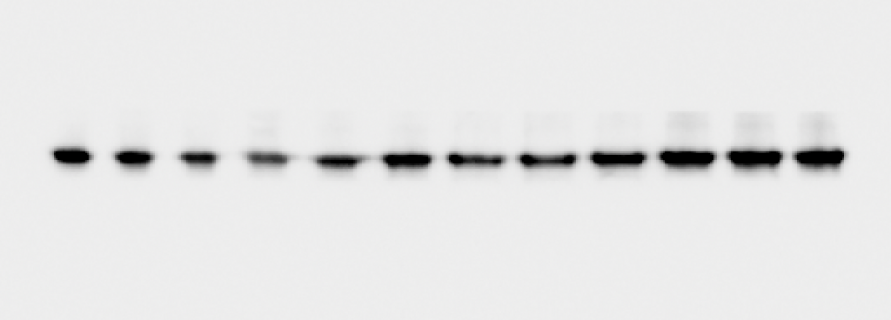
FTH/L**


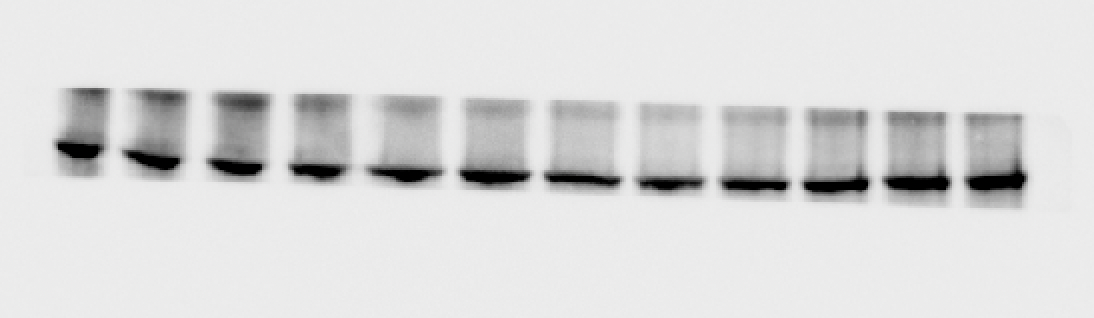
**Actin**

**Fig. 5H**


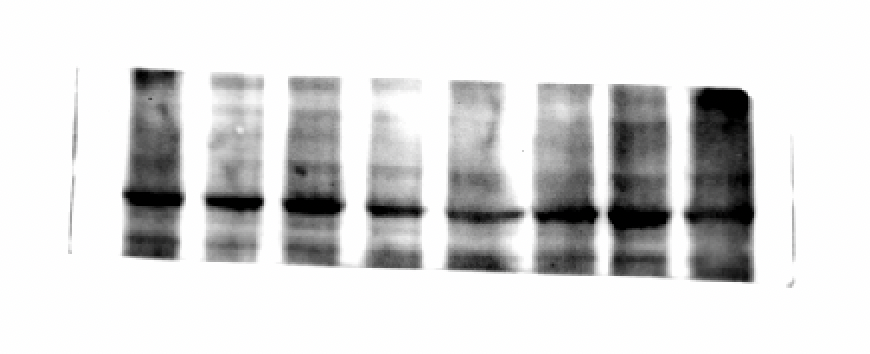
**pNRF2**


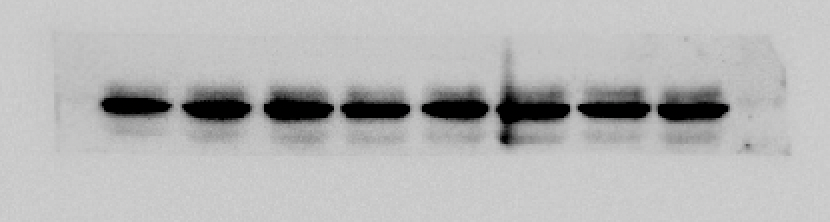
**NRF2**

**
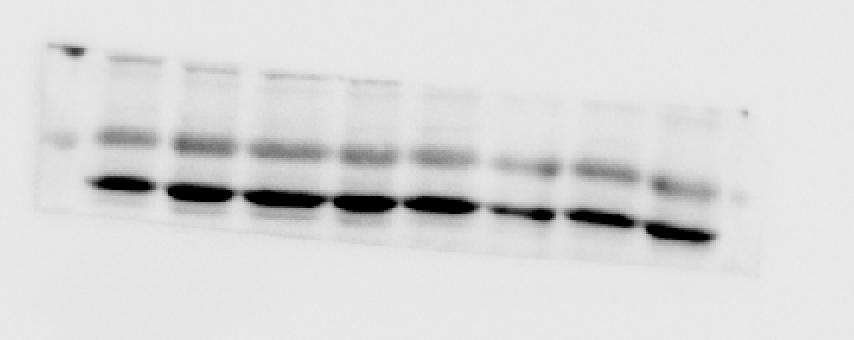
TFR1**

**
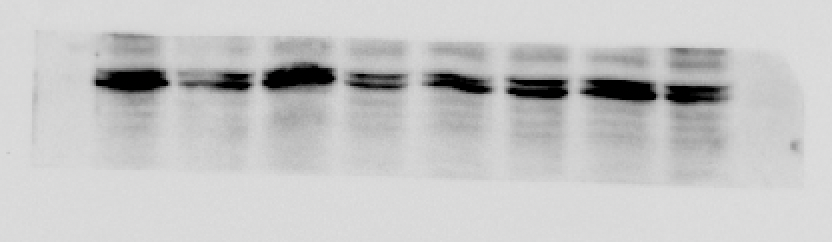
SLC3A2**

**
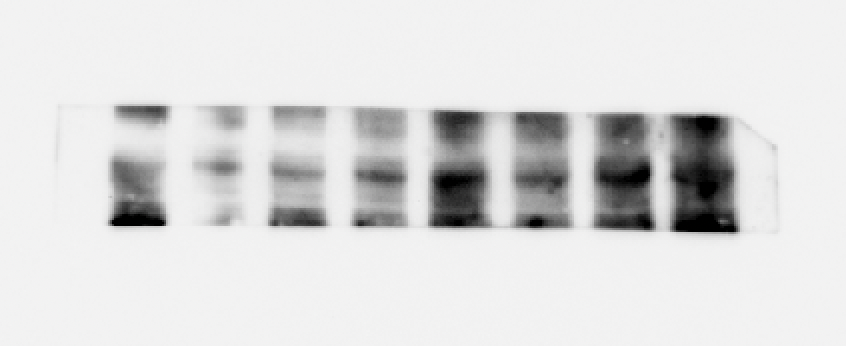
SLC40A1**

**
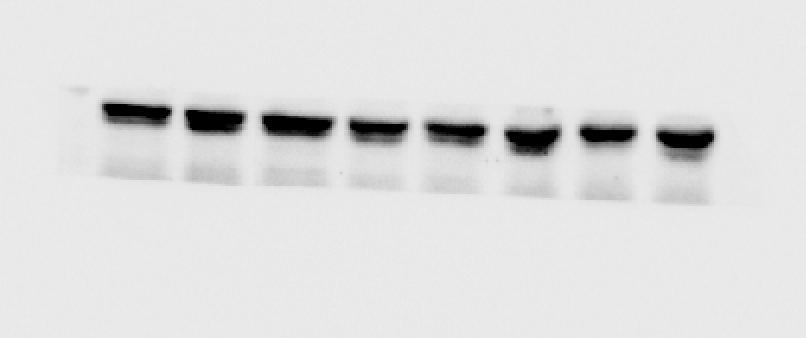
Keap1**

**
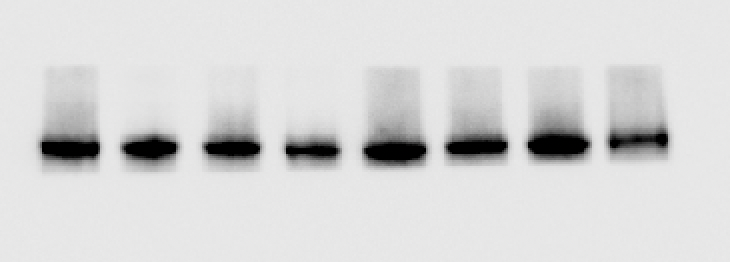
SQSTM1**

**
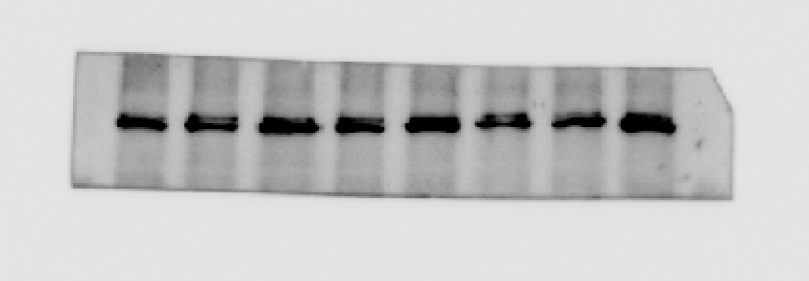
SLC7A11**


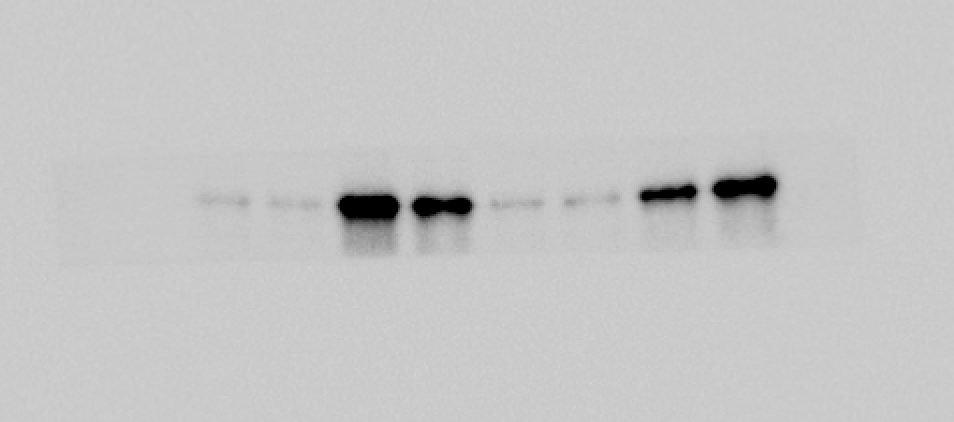
**HO-1**


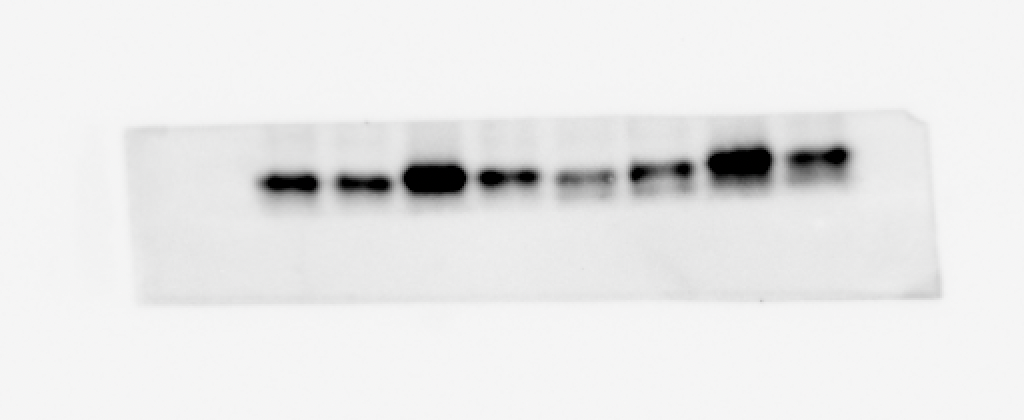
**GPX4**

**
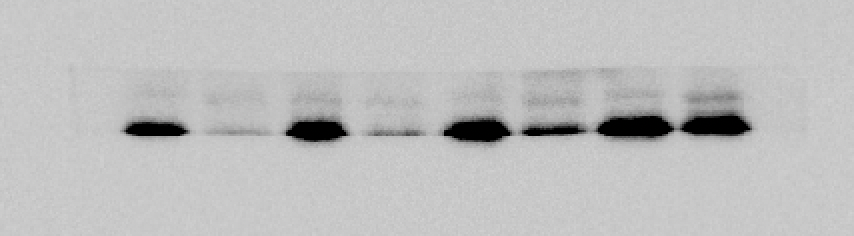
FTH/L**

**
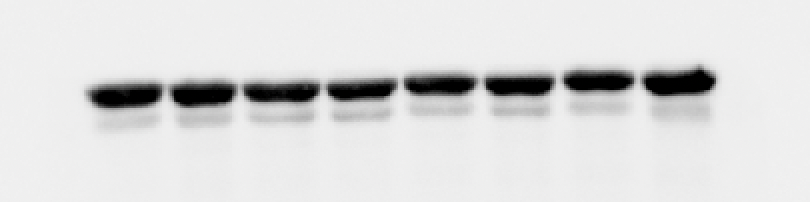
Actin**

**Fig. 6D**

**
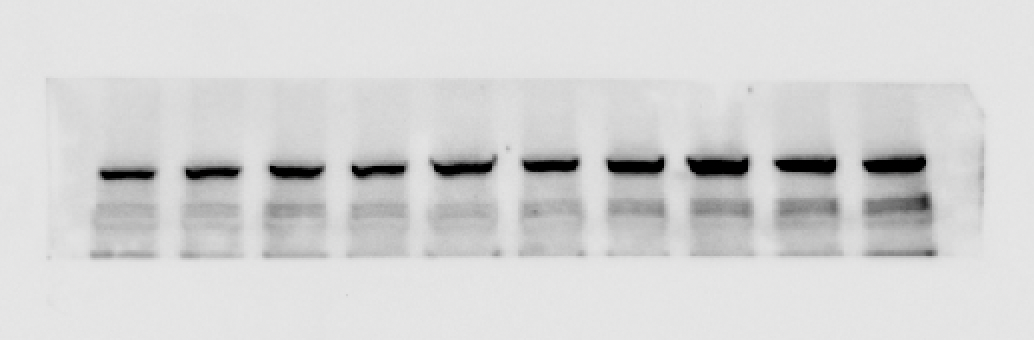
 pNRF2**

**
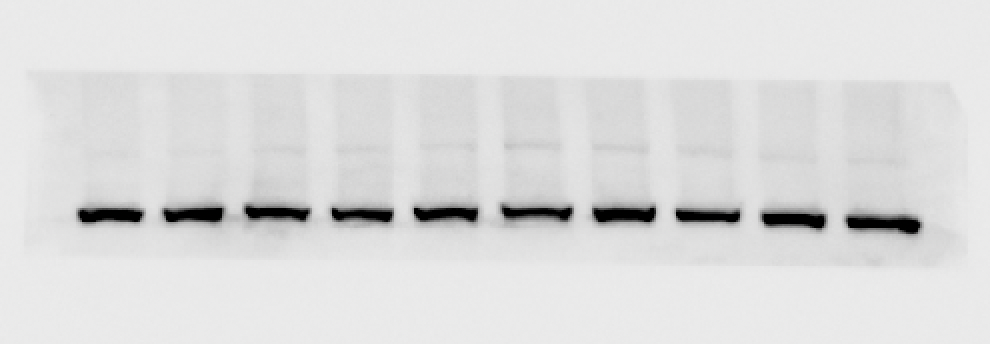
 NRF2**

**
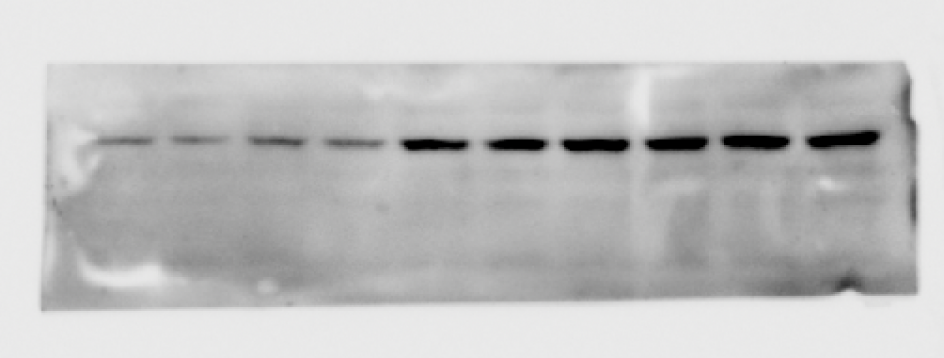
 HO-1**

**
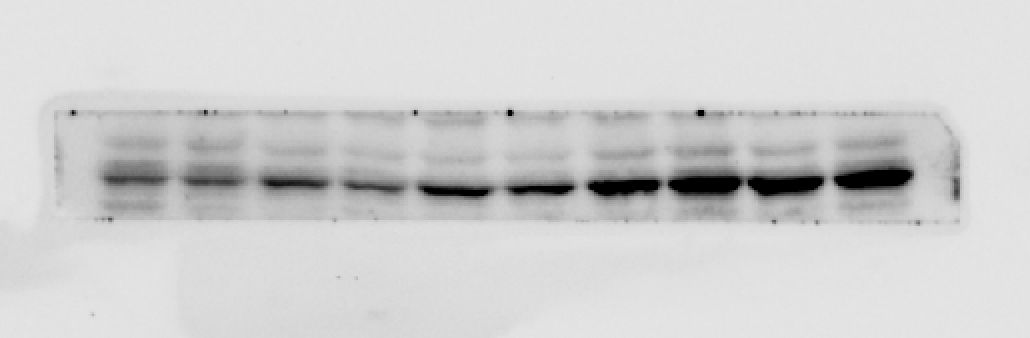
 NQO1**

**
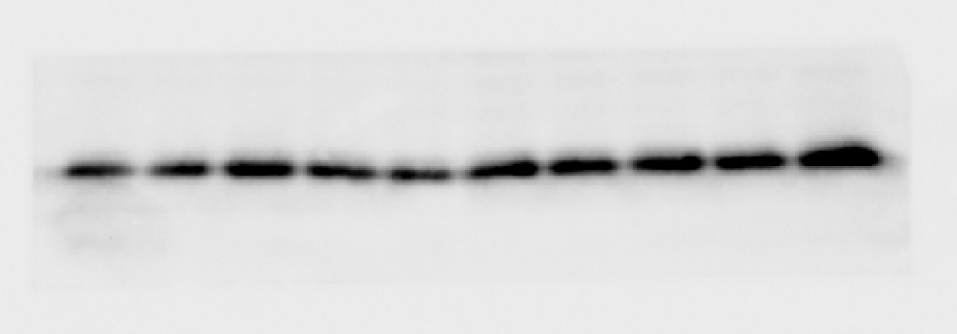
 GPX4**

**
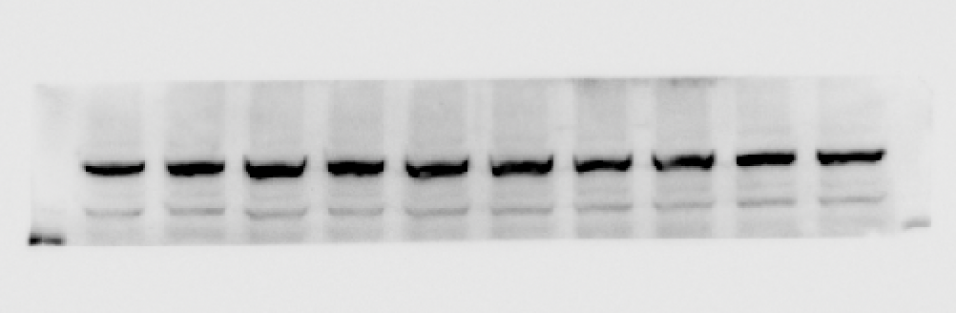
 Actin**

**Fig. 6E**

**
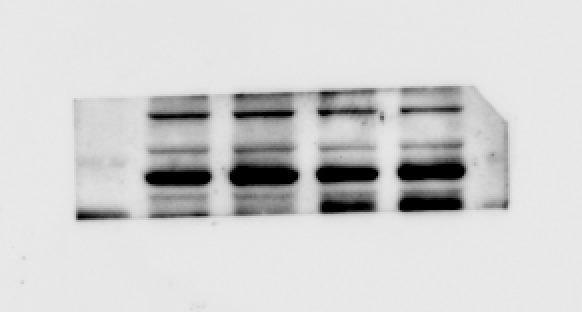
 NRF2 (Cytoplasm)**

**
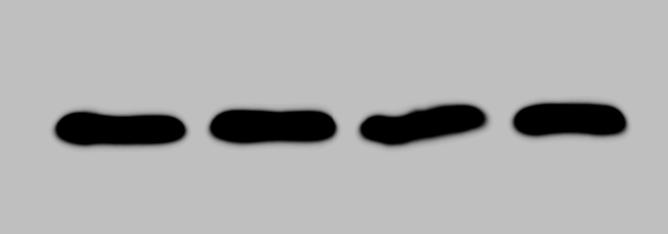
 Actin**

**
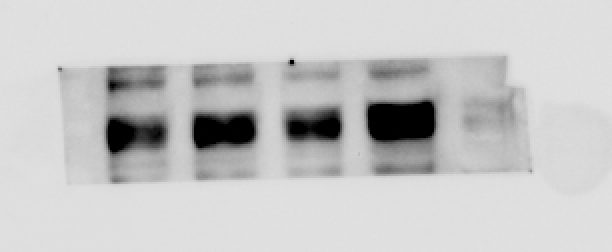
 NRF2 (Nuclear)**

**
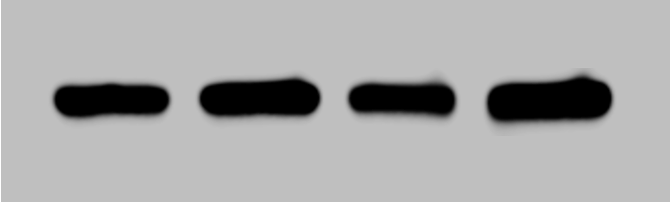
 Histone**

**Fig. 7D**

**
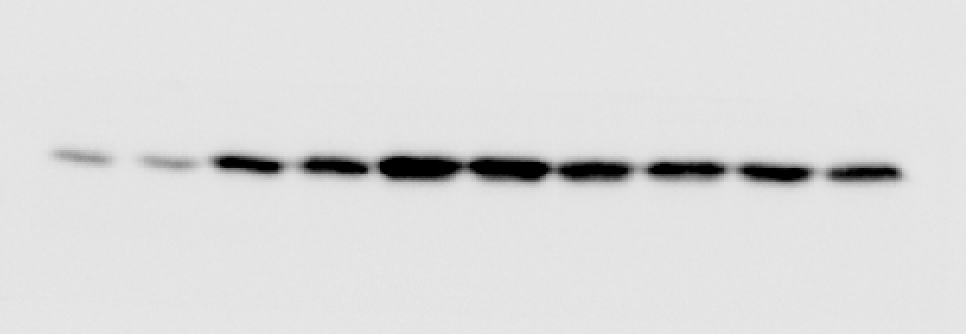
 FTH/L**

**
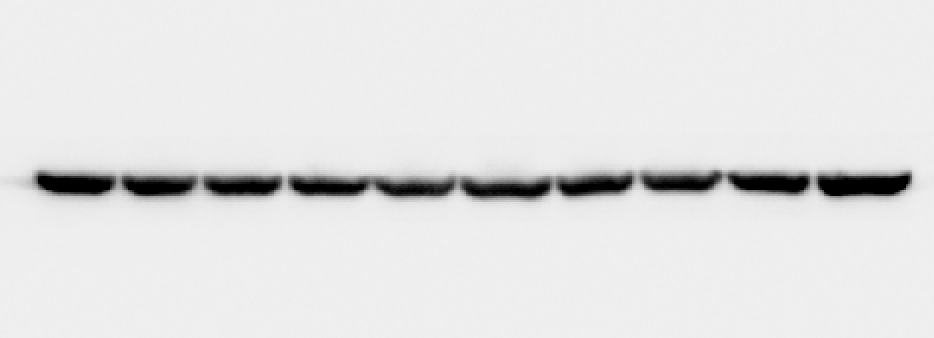
 Actin**
